# Supplementary material for: Retaining Skin Barrier Function Properties of the Stratum Corneum with Components of the Natural Moisturizing Factor—A Randomized, Placebo-Controlled Double-Blind In Vivo Study
Source: PubMed Central journal article supplement (PMC8000920; doi:10.3390/molecules26061649), 2021-03-16
Supplement: molecules-26-01649-s001.pdf [file molecules-26-01649-s001.pdf]

Supplementary Material to

# Retaining skin barrier function properties of the stratum corneum with components of the natural moisturizing factor – a randomized, placebo-controlled double-blind *in vivo* study

Johannes Schleusener <sup>1</sup>, Andrew Salazar <sup>2</sup>, Jörg von Hagen <sup>2</sup>, Jürgen Lademann <sup>1</sup> and Maxim E. Darvin <sup>1,\*</sup>

<sup>1</sup> Charité – Universitätsmedizin Berlin, Corporate Member of Freie Universität Berlin and Humboldt-Universität zu Berlin, Center of Experimental and Applied Cutaneous Physiology, Department of Dermatology, Venerology and Allergology, Charitéplatz 1, 10117, Berlin, Germany; johannes.schleusener@charite.de (J.S.); juergen.lademann@charite.de (J.L.); maxim.darvin@charite.de (M.D.)

<sup>2</sup> Merck KGaA, Frankfurterstr. 250, 64293 Darmstadt; joerg.von.hagen@merckgroup.com (J.v.H.); andrew.salazar@merckgroup.com (A.S.)

\* Correspondence: [maxim.darvin@charite.de](mailto:maxim.darvin@charite.de)

**Table S1.** Components of the applied formulations.

| Ingredients                                                                                   | INCI (EU)                                                                   | [%]    |
|-----------------------------------------------------------------------------------------------|-----------------------------------------------------------------------------|--------|
| Montanov 68                                                                                   | CETEARYL ALCOHOL, CETAEARYL GLUCOSIDE                                       | 4.00   |
| Span 60                                                                                       | SORBITAN STEARATE                                                           | 1.50   |
| Lanette® O                                                                                    | CETEARYL ALCOHOL                                                            | 1.00   |
| Isopropyl Palmitate                                                                           | ISOPROPYLPALMITATE                                                          | 3.00   |
| Cetiol® CC                                                                                    | DICAPRYLYL CARBONATE                                                        | 3.00   |
| Lanol 99                                                                                      | ISONONYL ISONONANOATE                                                       | 3.00   |
| Water, demineralized                                                                          | AQUA                                                                        | 59.40  |
| 1,2-Propanediol                                                                               | PROPYLENE GLYCOL                                                            | 3.00   |
| Rhodicare XC                                                                                  | XANTHAN GUM                                                                 | 0.30   |
| Citric acid anhydrous                                                                         | CITRIC ACID                                                                 | 0.10   |
| tri-Sodium Citrate dihydrate                                                                  | SODIUM CITRATE                                                              | 4.70   |
| Euxyl® PE 9010                                                                                | PHENOXYETHANOL,<br>ETHYLHEXYLGLYCERIN                                       | 1.00   |
| Water, demineralized                                                                          | AQUA                                                                        | 15.00  |
| proprietary mixture based on the composition of NMF (Verum) OR Water, demineralized (Placebo) | SERINE, CALCIUM LACTATE, PCA, ARGININE, HISTIDINE (Verum) OR AQUA (Placebo) | 1.00   |
|                                                                                               |                                                                             | 100.00 |
